# Supplementary material for: A pH-responsive natural cyclopeptide RA-V drug formulation for improved breast cancer therapy
Source: Royal Society of Chemistry journal article supplement (doi:10.1039/c5tb00445d), 2015-01-01
Supplement: c5tb00445d1.pdf [file c5tb00445d1.pdf]

# A pH-responsive natural cyclopeptide RA-V drug formulation for improved breast cancer therapy

Zeng-Ying Qiao,<sup>a,§</sup> Di Zhang,<sup>a,§</sup> Chun-Yuan Hou,<sup>a</sup> Si-Meng Zhao,<sup>b</sup> Ya Liu,<sup>c</sup> Yu-Juan Gao,<sup>a</sup> Ning-Hua Tan,<sup>\*,b</sup> and Hao Wang<sup>\*,a</sup>

<sup>a</sup> CAS Key Laboratory for Biological Effects of Nanomaterials and Nanosafety,  
National Center for Nanoscience and Technology (NCNST), Beijing 100190, China.  
Email: wanghao@nanoctr.cn

<sup>b</sup> State Key Laboratory of Phytochemistry and Plant Resources in West China,  
Kunming Institute of Botany, Chinese Academy of Sciences, Kunming 650201,  
Yunnan, China

<sup>c</sup> College of Marine Life Science, Ocean University of China, Qingdao, China.

<sup>§</sup> These authors contributed equally to this work.

**KEYWORDS:** cyclopeptide RA-V, micelle, poly( $\beta$ -amino ester)s, anti-cancer, tumor imaging.

## Synthesis of copolymers

The mPEG-g-poly(amino esters) graft copolymers (PAE) were typically prepared by Michael addition and all synthetic procedures were carried out under an nitrogen atmosphere. HDDA (0.226 g, 1 mmol), DBPA (0.117 g, 0.9 mmol), mPEG-NH<sub>2</sub> 2K (0.200 g, 0.1 mmol) were all dissolved into 2 mL dimethyl sulfoxide (DMSO), and then bubbled over N<sub>2</sub> for 15 min under stirring. The mixture was allowed to react for 7 days at 50 °C, and then the final reaction solution was dialyzed against deionized water (MWCO: 3500 Da). The polymer solution was lyophilized to obtain a pale yellow solid. The M<sub>n</sub> of PAE determined by GPC was 17400.

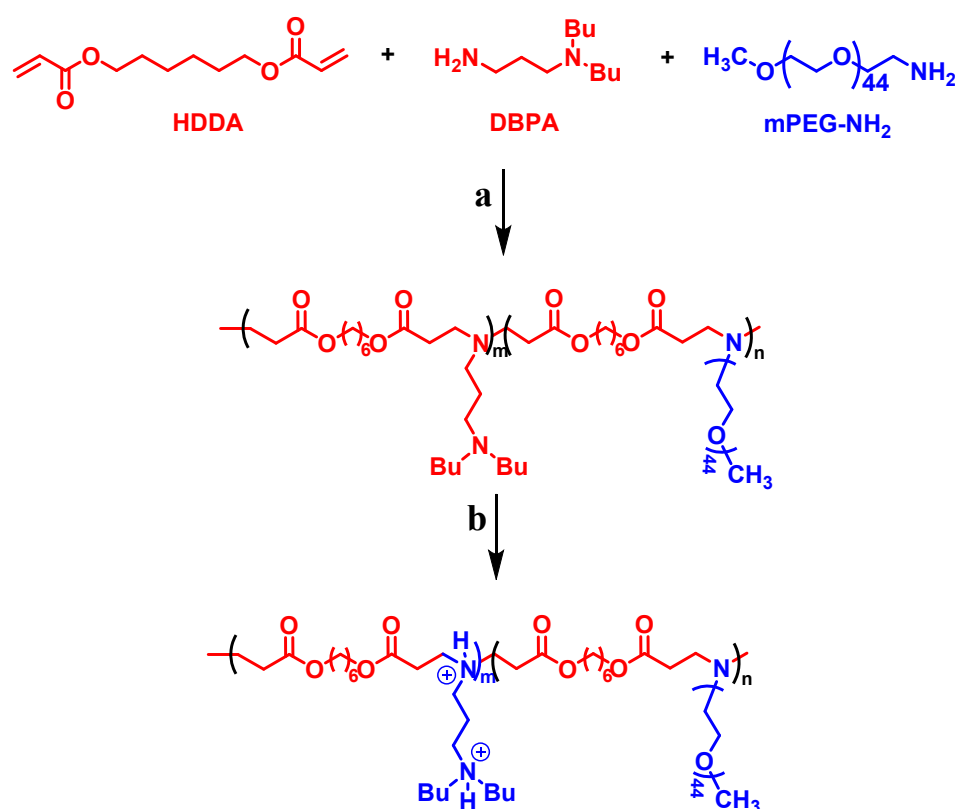

**Scheme S1.** Synthesis route and acid-triggered ionization of poly(β-amino ester)s copolymer. (a) Michael addition, DMSO, 50 °C, 7 d. (b) H<sub>2</sub>O/H<sup>+</sup>.

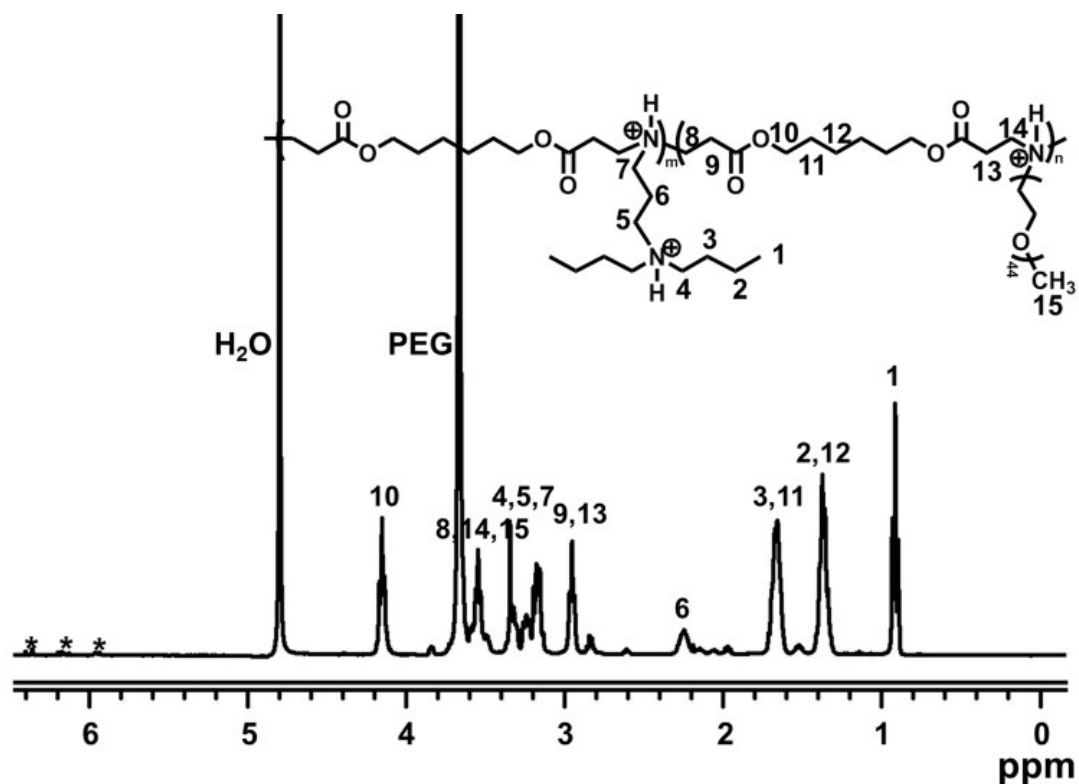

**Fig. S1.**  $^1\text{H}$  NMR spectrum of poly( $\beta$ -amino ester)s graft copolymers (**P1**) in  $\text{D}_2\text{O}$  containing 0.6 wt% DCl. Asterisks (\*) represent the double bonds of acrylate end groups. The polymer units and the average molecular weight of P1 calculated by NMR are around 30 and 20500, respectively.

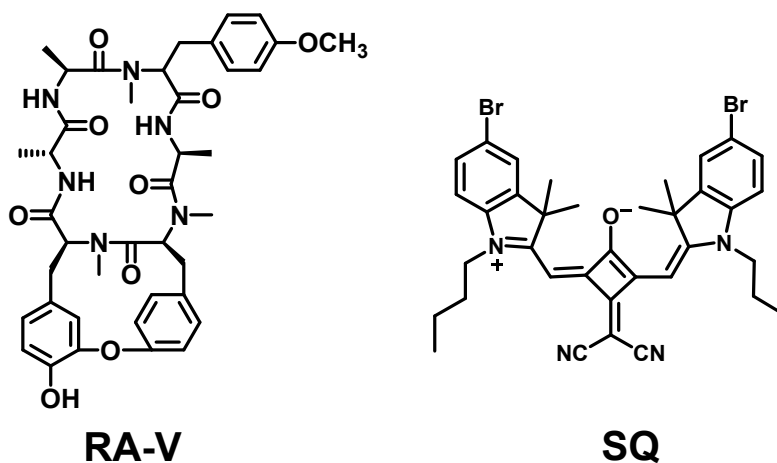

**Scheme S2.** The chemical structures of cyclopeptide **RA-V** and NIR probe squaraine (**SQ**).

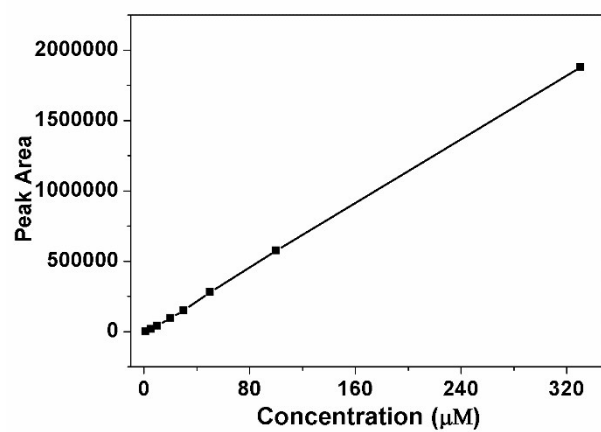

**Fig. S2.** The calibration curve of a series of solutions with various RA-V concentrations measured by HPLC. Mobile phase: acetonitrile/water (v/v=45/55).
